# Supplementary material for: miRNAture—Computational Detection of microRNA Candidates
Source: MDPI journal article supplement (doi:10.3390/genes12030348), 2021-02-27
Supplement: s1 [file s1]

# Supplement to: **miRNA<sub>ture</sub>**: Computational detection of microRNA candidates

Cristian A. Velandia-Huerto, Jörg Fallmann and Peter F. Stadler

February 19, 2021

## 1 Processing steps to generate a blast hit's *extended region*

Figure 1 depicts the processing steps performed by **miRNA<sub>ture</sub>** by the **blast** homology mode to generate *extended regions*. As an example, the detection of homologous candidates were performed on the scaffold JH126831.1 from *Latimeria chalumnae* using the **blast** strategy 1. The raw mapped coordinates were labeled as **str1RawBlast** and comprise all the **blast** hits generated in this genomic region without any filtering. After refining the candidates a reduced number of hits remains (labeled as **str1FilteredBlast**). An additional iteration of merging was required in order to combine two or more filtered hits that overlap at their genomic coordinates. Comparisons were performed only in terms of genomic coordinates and their correspondent coverage with respect to queries (**str1FusionBlast**). The final product of those comparisons (the *region*) (**str1StrFinal**) was then subject to further evaluation with **cmsearch**.

## 2 miRBase covariance models for human miRNA families

**miRBase** v.22 human miRNA annotation and database files were downloaded via FTP. A cross-reference between **miRBase** accession number and miRNA family name was created via custom **Perl** scripts for later analysis of benchmark sets. 586 families representing a total of 1012 from 1913 currently annotated human miRNA *loci* could be curated. From this, a representative dataset of corrected multiple structural alignments was generated via **MIRfix** [7] and used to build family specific covariance models with **Infernal** [5]. For details about the combination of parameters to generate the final 350 CMs refer to Table 2. Command-line calls are listed in Section 6.

## 3 Discarded let-7 secondary structures from vertebrates

The structural evaluation performed in the final stage of **miRNA<sub>ture</sub>** discarded annotated loci in primates (*K-let-7*) and mouse (*G-let-7*), based on their secondary structure depicted on Figure 3. In the first case, consensus structure for *K-let-7* sequences are reported, taking as reference the primate sequences from [3]. On second structure, **miRBase** (*mmu-let-7c-2*, MI0000560) *let-7* sequence on mouse corresponded in [3] as a member of *G-let-7-1* paralogs.

## 4 Tables

Table 1: **Blastn** [2] strategies integrated in **miRNature** for miRNAs detection on homology level. Strategies 1-4 are based on [6], strategy 5 on [3] and **blastn** default strategy (6).

| <b>Blastn strategies</b> |    |      |    |       |             |   |
|--------------------------|----|------|----|-------|-------------|---|
| <i>Flag</i>              | 1  | 2    | 3  | 4     | 5           | 6 |
| -dust                    |    |      |    | no    |             | D |
| -soft_masking            |    |      |    | false |             | D |
| -reward                  | 5  | 4    | 5  | 4     | D           | D |
| -penalty                 | -4 | -5   | -4 | -5    | D           | D |
| -gapopen                 | 10 | 3    | 25 | 12    | D           | D |
| -gapextend               | 6  | 5    | 10 | 8     | D           | D |
| -word_size               |    | 7    |    |       | D           | D |
| -evaluate                |    | 0.01 |    |       | $10e^{-10}$ | D |
| -outfmt                  |    |      |    | 6     |             |   |

Table 2: Selection parameters defining representative sequences for the generation of miRNA CMs from **miRBase**. Parameters list as follows: *Target Clade* (target clade of available sequences); *Identity* (range of sequence identity between family members).

| <b>Strategy</b>     |                 | <b>Comments</b>                                                                                                                              | <b>Valid CMs</b> |
|---------------------|-----------------|----------------------------------------------------------------------------------------------------------------------------------------------|------------------|
| <i>Target Clade</i> | <i>Identity</i> |                                                                                                                                              |                  |
| Mammalia            | < 100           | -                                                                                                                                            | 283              |
| Vertebrata          | < 100           | Considering only high confidence sequences                                                                                                   | 12               |
| Vertebrata          | -               | -                                                                                                                                            | 8                |
| Vertebrata          | $90 \leq 95$    | -                                                                                                                                            | 3                |
| Vertebrata          | < 85            | -                                                                                                                                            | 1                |
| Mammalia            | < 100           | High confidence dataset                                                                                                                      | 2                |
| Primates            | < 100           |                                                                                                                                              | 1                |
| -                   | $\leq 100$      | All available sequences were considered independent of confidence reported in <b>miRBase</b> , manual curation after iteration of parameters | 34               |
| Vertebrata          | $90 \leq 100$   | Manual curation after iteration of parameters                                                                                                | 6                |
| Total               |                 |                                                                                                                                              | 350              |

Table 3: Strand-switch candidates detected by **miRNA** in comparison to **miRBase** annotation for the human genome. **Overlap**: overlap state of predicted loci (either no overlap or partial); \*: **miRNA** predicts better match on opposite strand of **miRBase** annotation.

|         | <b>Overlap</b> | <b>Family</b>          | <b>Annotation</b>                  | <b>Accession number</b> |
|---------|----------------|------------------------|------------------------------------|-------------------------|
| None    |                | mir-764 (MIPF0000707)  | hsa-mir-764*                       | MI0003944               |
|         |                | mir-873 (MIPF0000390)  | hsa-mir-873                        | MI0005564               |
|         |                | mir-140 (MIPF0000085)  | hsa-mir-140*                       | MI0000456               |
|         |                | mir-1306 (MIPF0000531) | hsa-mir-1306*                      | MI0006443               |
| Partial |                | mir-103 (MIPF0000024)  | hsa-mir-103b-1*<br>hsa-mir-103b-2* | MI0007261<br>MI0007262  |
|         |                | mir-101 (MIPF0000046)  | hsa-mir-101-2                      | MI0000739               |
|         |                | mir-122 (MIPF0000095)  | hsa-mir-122b                       | MI0017383               |
|         |                | mir-290 (MIPF0000068)  | hsa-mir-371b*                      | MI0017393               |
|         |                | mir-451 (MIPF0000148)  | hsa-mir-451b                       | MI0017360               |
|         |                | mir-515 (MIPF0000020)  | hsa-mir-1283-2                     | MI0006430               |
|         |                | mir-548 (MIPF0000317)  | hsa-mir-548aa-2                    | MI0016690               |
|         |                | mir-1245 (MIPF0000620) | hsa-mir-1245b                      | MI0017431               |
|         |                | mir-4536 (MIPF0001319) | hsa-mir-4536-1                     | MI0016906               |
|         |                |                        |                                    |                         |

Table 4: Additional loci on the strand opposite of human repeats.

| <b>Family</b> | <b>Loci number</b> | <b>Repeat family</b>                                           |
|---------------|--------------------|----------------------------------------------------------------|
| mir-544       | 50                 | MER5A1                                                         |
| mir-548       | 42                 | MADE1                                                          |
| mir-1302      | 27                 | MER53                                                          |
| mir-1289      | 17,4               | MER5A,MER5B                                                    |
| mir-649       | 19                 | MER8                                                           |
| mir-297       | 13                 | MER8                                                           |
| mir-1277      | 10                 | L1MC4, L1P5, LTR16                                             |
| mir-574       | 9                  | Multiple short repeats: (TG) <sub>n</sub> or (GT) <sub>n</sub> |
| mir-483       | 9                  | GA-rich                                                        |
| mir-1285      | 7                  | Alu                                                            |
| mir-4536      | 5                  | L1MC4                                                          |
| mir-645       | 4                  | MER1A, MER1B                                                   |
| mir-559       | 4                  | Multiple families                                              |
| mir-1262      | 4                  | Multiple families                                              |

Table 5: Listing of annotated human miRNA families with additional miRNA<sub>ture</sub> predictions but no direct overlap due to filtering and reasons for that filtering in **bold**. Labels: **Ann.** Annotated, **Pred.** Predicted.

| Family   | Ann.<br>loci | Pred.<br>loci | Accession                     | Comments                                                                                                                                                                                    |
|----------|--------------|---------------|-------------------------------|---------------------------------------------------------------------------------------------------------------------------------------------------------------------------------------------|
| mir-1233 | 2            | 21            | hsa-mir-1233-1<br>(MI0006323) | Family composed of 7 primate sequences, 2 from human. All mature sequences predicted by similarity to MI0006323. <b>Predicted mature sequence outside hairpin precursor.</b>                |
|          |              |               | hsa-mir-1233-2<br>(MI0015973) |                                                                                                                                                                                             |
| mir-1291 | 1            | 4             | hsa-mir-1291<br>(MI0006353)   | Family composed by 9 sequences, and multiple species. <b>Predicted hairpin precursor folds into invalid structure.</b>                                                                      |
| miR-297  | 1            | 69            | hsa-mir-297<br>(MI0005775)    | Mouse specific validated family. Predicted miRNAs by similarity to primates. Human mature supported by 10 reads. <b>Annotated sequence too short for homology stage detection.</b>          |
| mir-6127 | 1            | 1             | hsa-mir-6127<br>(MI0021271)   | Long secondary structure, experimental support only in human. Family composed of 3 sequences from chimp, macaque and human. <b>Predicted hairpin precursor folds into invalid structure</b> |
| mir-645  | 1            | 9             | hsa-mir-645<br>(MI0003660)    | Family composed of 3 primate sequences. Only one in human is supported by experiments. <b>Overlap between mir and mir* on predicted precursor.</b>                                          |
| miR-652  | 1            | 11            | hsa-mir-652<br>(MI0003667)    | Predicted homology candidates on both strands. <b>Available annotated mature sequences did not match with predicted precursors. Low similarity.</b>                                         |
| mir-877  | 1            | 1             | hsa-mir-877<br>(MI0005561)    | <b>Not possible to predict mir* based on available mature sequence located in loop or outside hairpin precursor.</b>                                                                        |
| mir-873  | 1            | 1             | hsa-mir-873<br>(MI0005564)    | <b>Discarded annotated candidate due to folding into invalid structure.</b>                                                                                                                 |
| mir-1306 | 1            | 1             | hsa-mir-1306<br>(MI0006443)   | <b>miRNA<sub>ture</sub> predicts loci opposite to annotation as valid.</b>                                                                                                                  |
| mir-140  | 1            | 1             | hsa-mir-140<br>(MI0000456)    |                                                                                                                                                                                             |
| mir-764  | 1            | 1             | hsa-mir-764<br>(MI0003944)    |                                                                                                                                                                                             |

Table 6: Human miRNAs annotated in miRBase where no miRNA candidate passed the evaluation stage. General description of filtering in **bold**.

| Family    | Ann. loci | Accession                                                                              | Comments                                                                                                         |
|-----------|-----------|----------------------------------------------------------------------------------------|------------------------------------------------------------------------------------------------------------------|
| mir-1184  | 3         | hsa-mir-1184-1 (MI0006277)<br>hsa-mir-1184-2 (MI0015971)<br>hsa-mir-1184-3 (MI0015972) | Family annotated only in human and chimpanzee. <b>More species should be annotated.</b>                          |
| mir-1207  | 1         | hsa-mir-1207 (MI0006340)                                                               | Short predicted mature. <b>Invalid structure.</b>                                                                |
| mir-1224  | 1         | hsa-mir-1224 (MI0003764)                                                               | Branched miRNA precursor. <b>Invalid structure.</b>                                                              |
| mir-1260b | 1         | hsa-mir-1260b (MI0014197)                                                              | Short predicted mature. <b>Broken mature prediction.</b>                                                         |
| mir-1282  | 1         | hsa-mir-1282 (MI0006429)                                                               | Long sequence, mature sequences not matching. <b>Broken mature prediction.</b>                                   |
| mir-1287  | 1         | hsa-mir-1287 (MI0006349)                                                               | Structural evaluation failed for all members of this family. <b>Invalid structure.</b>                           |
| mir-1307  | 1         | hsa-mir-1307 (MI0006444)                                                               | Short predicted mature. <b>Broken mature prediction.</b>                                                         |
| mir-1343  | 1         | hsa-mir-1343 (MI0017320)                                                               | Mature sequence position does not fit annotation. <b>Broken mature prediction.</b>                               |
| mir-187   | 1         | hsa-mir-187 (MI0000274)                                                                | Long and invalid structure. <b>Invalid structure.</b>                                                            |
| mir-331   | 1         | hsa-mir-331 (MI0000812)                                                                | Mature did not match by one nt, predicted on both strands, alignment with gaps. <b>Broken mature prediction.</b> |
| mir-339   | 1         | hsa-mir-339 (MI0000815)                                                                | Long and invalid structure. <b>Invalid structure.</b>                                                            |
| mir-384   | 1         | hsa-mir-384 (MI0001145)                                                                | Annotated by similarity with mouse sequence (MI0001146). <b>Lack of experimental support.</b>                    |
| mir-454   | 1         | hsa-mir-454 (MI0003820)                                                                | Mature did not match by 4nt, alignment with gaps. <b>Broken mature prediction.</b>                               |
| mir-484   | 1         | hsa-mir-484 (MI0002468)                                                                | Not possible to locate mir* sequence in the predicted hair-pin. <b>Broken mature prediction.</b>                 |
| mir-550   | 5         | hsa-mir-550a-1 (MI0003600)                                                             | Predicted in both strans. <b>Failed evaluation.</b>                                                              |
|           |           | hsa-mir-550a-2 (MI0003601)                                                             |                                                                                                                  |
|           |           | hsa-mir-550a-3 (MI0003762)                                                             | Long and invalid structure. Predicted on both strands. <b>Invalid structure.</b>                                 |
|           |           | hsa-mir-550b-1 (MI0016686)                                                             | Predicted on both strands. <b>Failed evaluation.</b>                                                             |
|           |           | hsa-mir-550b-2 (MI0016687)                                                             | Predicted on both strands. Located at same region as MI0016686. <b>Failed evaluation.</b>                        |
| mir-554   | 1         | hsa-mir-554 (MI0003559)                                                                | Predicted mir* in loop and invalid structure. <b>Non-canonical mature.</b>                                       |
| mir-593   | 1         | hsa-mir-593 (MI0003605)                                                                | Not possible to predict mir*, overlaps mir and structure invalid. <b>Non-canonical mature.</b>                   |
| mir-601   | 1         | hsa-mir-601 (MI0003614)                                                                | Invalid structure. <b>Invalid structure.</b>                                                                     |
| mir-626   | 1         | hsa-mir-626 (MI0003640)                                                                | Invalid structure. <b>Invalid structure.</b>                                                                     |
| mir-631   | 1         | hsa-mir-631 (MI0003645)                                                                | Not possible to predict mir*, overlaps mir and structure invalid. <b>Non-canonical mature.</b>                   |
| mir-632   | 1         | hsa-mir-632 (MI0003647)                                                                |                                                                                                                  |
| mir-646   | 1         | hsa-mir-646 (MI0003661)                                                                | Structural evaluation failed for all members of this family. <b>Invalid structure.</b>                           |
| mir-657   | 1         | hsa-mir-657 (MI0003681)                                                                | Invalid structure. <b>Invalid structure.</b>                                                                     |
| mir-665   | 1         | hsa-mir-665 (MI0005563)                                                                | Not possible to predict mir*, overlaps mir and structure invalid. <b>Non-canonical mature.</b>                   |
| mir-766   | 1         | hsa-mir-766 (MI0003836)                                                                |                                                                                                                  |
| mir-938   | 1         | hsa-mir-938 (MI0005760)                                                                | Not possible to predict mature sequences. <b>Broken mature prediction.</b>                                       |
| mir-940   | 1         | hsa-mir-940 (MI0005762)                                                                | Not possible to predict mir*, overlaps mir and structure invalid. <b>Non-canonical mature.</b>                   |

Table 7: Overlaps between prediction of **miRNA**ture with other annotated miRNA families from **miRBase**.

| Predicted | Annotated | Region                  | Comments                                                                                |
|-----------|-----------|-------------------------|-----------------------------------------------------------------------------------------|
| mir-633   | MIR4679-1 | 10:89063332-89063416,+  | Human specific family (hsa-mir-4679-1 and hsa-mir-4679-2).                              |
| mir-1271  | MIR3169   | 13:61199802-61199874,-  | Human specific locus (hsa-mir-3169).                                                    |
| mir-610   | MIR5580   | 14:53948418-53948492,-  | Human specific locus (hsa-mir-5580).                                                    |
| mir-423   | MIR3184   | 17:30117082-30117162,-  | Human specific locus (hsa-mir-3184).                                                    |
| mir-1295  | MIR1295B  | 1:171101729-171101809,+ | Human specific locus (hsa-mir-1295b).                                                   |
| mir-3151  | MIR5008   | 1:227941597-227941674,- | Human specific locus (hsa-mir-5008).                                                    |
| mir-9     | MIR4794   | 1:64579834-64579938,+   | Human specific locus (hsa-mir-4794).                                                    |
| mir-499   | MIR499B   | 20:34990397-34990473,-  | Family not included in the <b>miRBase</b> family. Previously annotated as hsa-mir-499a. |
| mir-3173  | MIR4773-2 | 2:151368335-151368408,- | Human specific family (hsa-mir-4773-1 and hsa-mir-4773-2).                              |
|           | MIR4773-1 | 2:151368336-151368411,+ |                                                                                         |
| mir-944   | MIR5186   | 3:151565890-151565980,- | Human specific locus (hsa-mir-5186).                                                    |
| mir-616   | MIR4471   | 8:100382757-100382853,+ | Human specific locus (hsa-mir-4471).                                                    |

# 5 Figures

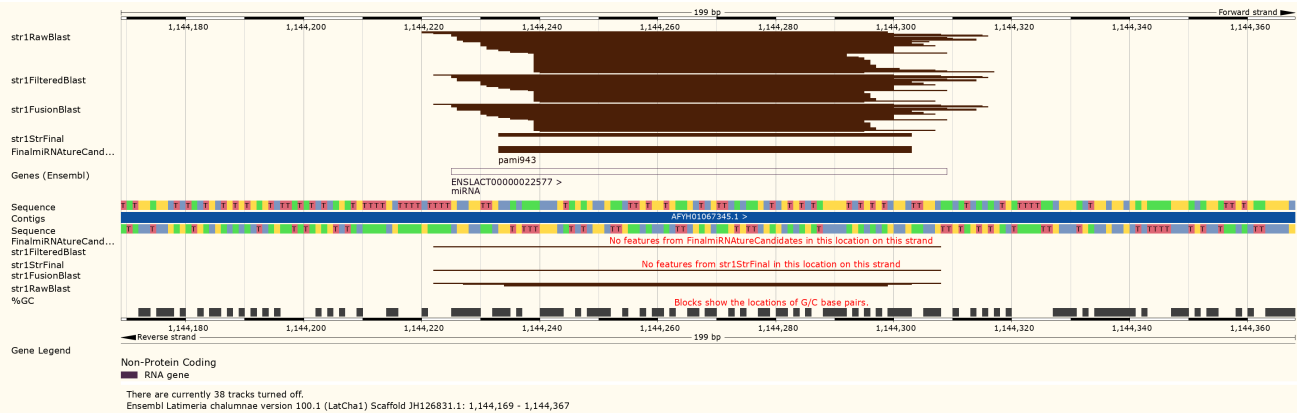

Figure 1: Visualization of merging and annotation process performed by miRNature to generate *extended regions*. *blastn* hits from strategy 1 are colored as brown tracks.

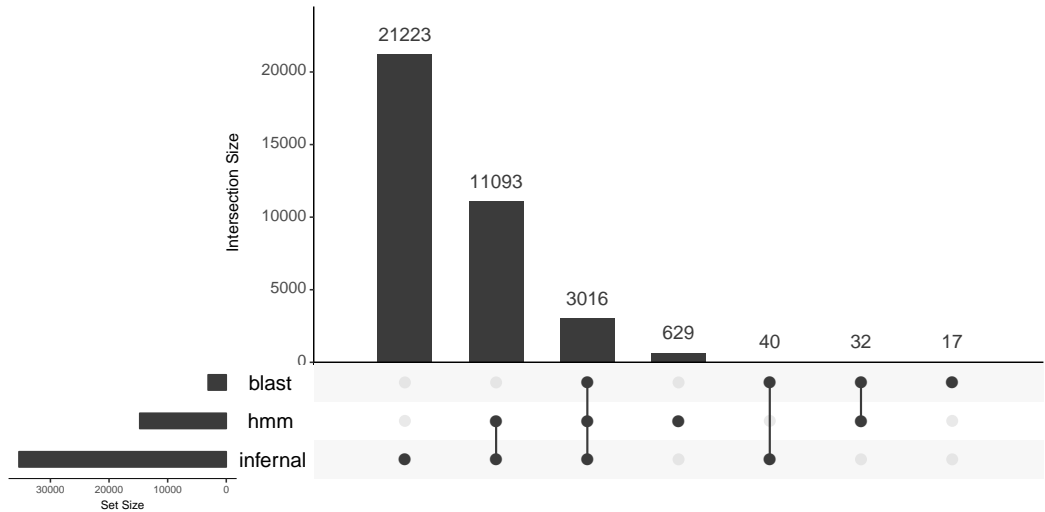

Figure 2: Comparison of the intersection sizes between homology regions annotated by the available homology searches in miRNature using *blast*, *nhmmer* (*hmm*) and *Infernal* searches in the human miRNA re-annotation.





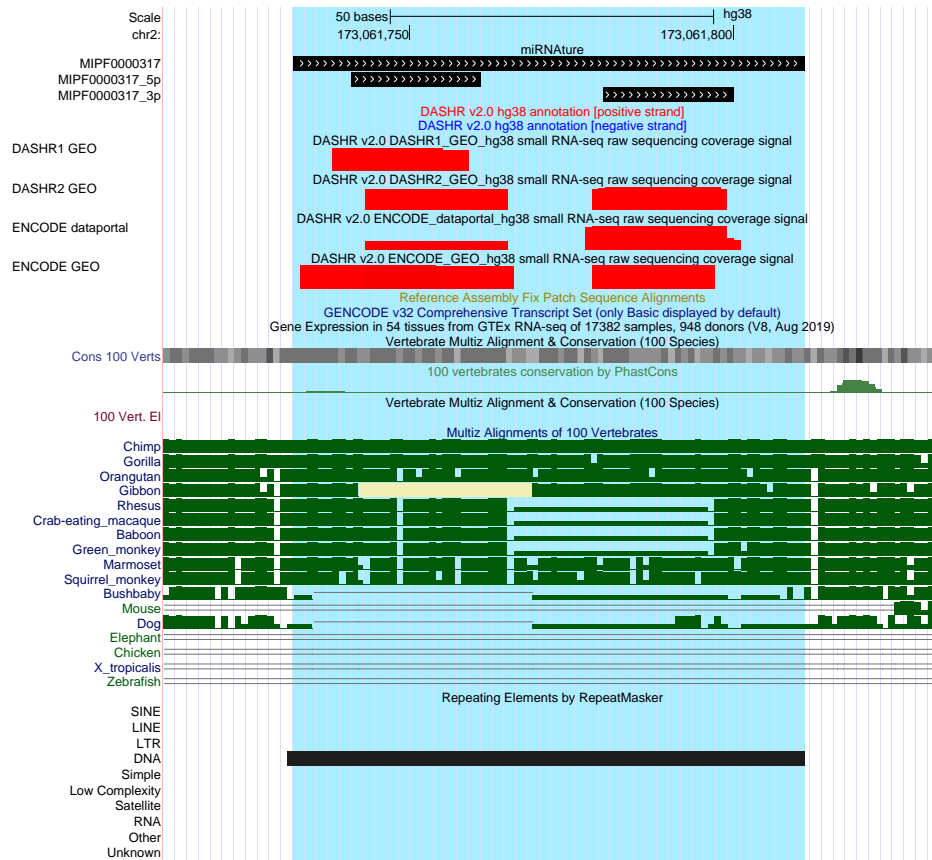

Figure 5: New predicted *mir-548* locus in opposite strand overlap with a DNA repeat element from the family Tc1/Mariner (MADE1). Expression data (from [4]) is highlighted in red.



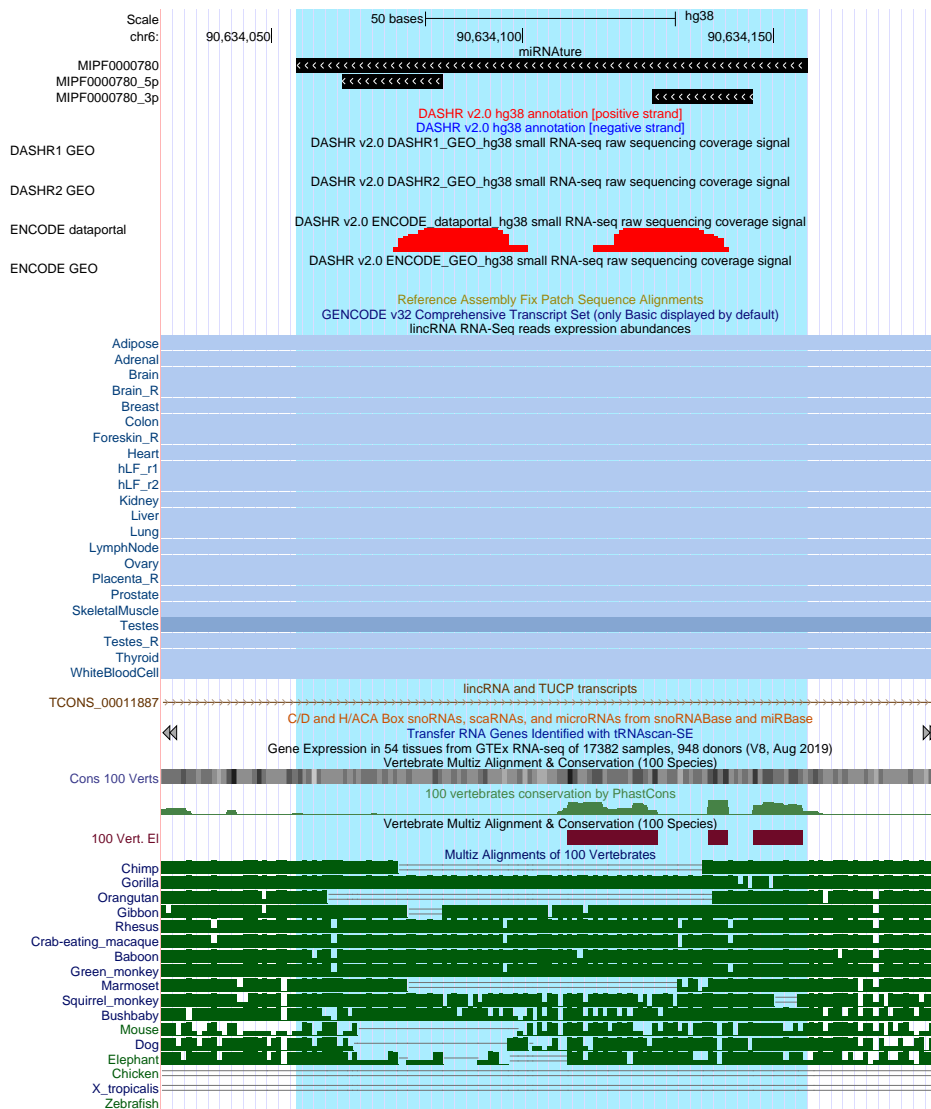

Figure 7: A new predicted *mir-606* locus overlaps with a known lincRNA (lnc-GJA10-5). Additionally to the expression data from sRNA-seq (from [4] in red), the expression data of the lincRNA (from [1]) is highlighted as pale-blue tracks.

## 6 Command line Methods

```
1
2 ./miRNature -stage complete -sublist <LIST Let-7 CMs> -speG <Path_specie_genome> \\
3   -speN <Specie-name> -speT <Specie-Tag> -w <OUTPUT_DIR> -mfx <Path_MIRFix> \\
4   -m <Blast,HMM,OTHER_CM,Infernal,Final> -pe 1 -str <1,2,3,5,6,ALL> -blastq \\
5   <Blast_queries_folder> -rep default,150,100
```

Listing 1: miRNature parameters to annotate let-7 loci on vertebrate genomes.

```
1
2 ./miRNature -stage complete -sublist <LIST HUMAN CM> -speG <Human Genome> \\
3   -speN "Homo sapiens" -speT Hosa -w <OUT FOLDER> -mfx <Path_MIRFix> \\
4   -m <Blast,HMM,OTHER_CM,Final> -pe 1 -str <5,6,ALL> \\
5   -blastq <Blast_queries_folder> -rep default,150,100
```

Listing 2: Re-annotation of miRNAs on human genome.

```
1 # Clustal omega
2 clustalo -i <multifasta file> --outfmt clu -o <output file>
3 # ViennaRNA package
4 RNAalifold --aln-stk=<fasta file> <align file>
5 # INFERNAL package
6 cmbuild <Covariance Model> <STO file>
7 cmcalibrate --cpu=20 <CM>
8 cmsearch --cpu 4 --tblout <TABULAR OUT> -o <OUT> <CM> <GENOME>
```

Listing 3: Modification of Covariance Models

## References

- [1] Moran N. Cabili, Cole Trapnell, Loyal Goff, Magdalena Koziol, Barbara Tazon-Vega, Aviv Regev, and John L. Rinn. Integrative annotation of human large intergenic noncoding rnas reveals global properties and specific subclasses. *Genes & Development*, 25(18):1915–1927, 2011.
- [2] Christiam Camacho, George Coulouris, Vahram Avagyan, Ning Ma, Jason Papadopoulos, Kevin Bealer, and Thomas L. Madden. BLAST+: architecture and applications. *BMC Bioinformatics*, 10:421, 2009.
- [3] Jana Hertel, Sebastian Bartschat, Axel Wintsche, Christian Otto, The Students of the Bioinformatics Computer Lab 2011, and Peter F. Stadler. Evolution of the let-7 microRNA family. *RNA Biology*, 9:231–241, 2012.
- [4] Pavel P Kuksa, Alexandre Amlie-Wolf, Živadin Katanić, Otto Valladares, Li-San Wang, and Yuk Yee Leung. DASHR 2.0: integrated database of human small non-coding RNA genes and mature products. *Bioinformatics*, 35:1033–1039, 2018.
- [5] Eric P. Nawrocki and Sean R. Eddy. Infernal 1.1: 100-fold faster rna homology searches. *Bioinformatics*, 29:2933–2935, 2013.
- [6] Cristian A Velandia-Huerto, Adriaan Gittenberger, Federico D Brown, Peter F. Stadler, and Clara I Bermúdez-Santana. Automated detection of ncRNAs in the draft genome sequence of a basal chordate: The carpet sea squirt *Didemnum vexillum*. *BMC Genomics*, 17:591, 2016.
- [7] Ali M. Yazbeck, Peter F. Stadler, Kifah Tout, and Jörg Fallmann. Automatic curation of large comparative animal microRNA data sets. *Bioinformatics*, 35:4553–4559, 2019.
